# Supplementary material for: Self-assembled and pH-responsive polymeric nanomicelles impart effective delivery of paclitaxel to cancer cells
Source: Royal Society of Chemistry journal article supplement (doi:10.1039/d1ra01574e), 2021-01-01
Supplement: d1ra01574e1.pdf [file d1ra01574e1.pdf]

## **Supplementary Information**

### **Self-assembled and pH-responsive Polymeric Nanomicelles Impart Effective Delivery of Paclitaxel to Cancer Cells**

Ashok Kumar Jangid<sup>1, †</sup>, Deep Pooja<sup>2, †</sup>, Poonam Jain<sup>1</sup>, Nitin Gupta<sup>1</sup>, Shwathy Ramesan<sup>3</sup>,  
Hitesh Kulhari<sup>1\*</sup>

<sup>1</sup>School of Nano Sciences, Central University of Gujarat, Gandhinagar-382030, Gujarat, India.

<sup>2</sup>Centre for Advanced Materials and Industrial Chemistry, School of Science, RMIT University, 124 La Trobe Street, 3000, Melbourne, Australia.

<sup>3</sup>School of Engineering, RMIT University, Melbourne, Victoria, 3001 Australia.

#### **\*Authors for Correspondence:**

Dr. Shwathy Ramesan

Email: [rameshshwathy@gmail.com](mailto:rameshshwathy@gmail.com)

Phone: +61450097825

Dr. Hitesh Kulhari

Email: [hitesh.kulhari@cug.ac.in](mailto:hitesh.kulhari@cug.ac.in)

Phone: +91 9494751080

<sup>†</sup>Authors contributed equally.

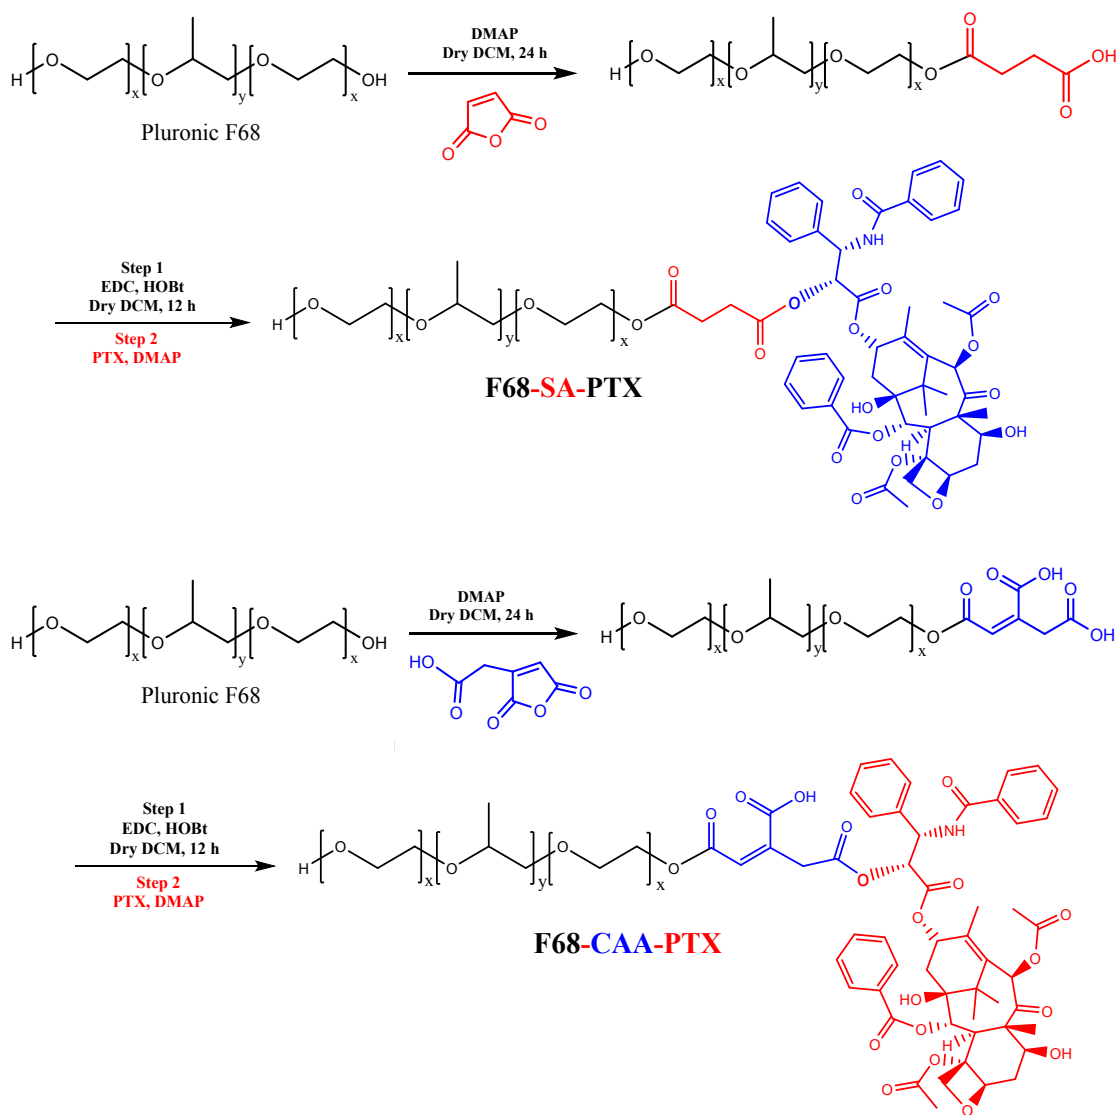

**Figure S1.** Scheme represents the conjugation process of pluronic F68 and PTX conjugate *via* succinoyl group (F68-SA-PTX) and pluronic F68 and PTX conjugate *via* cis-aconitinoyl group (F68-CAA-PTX).

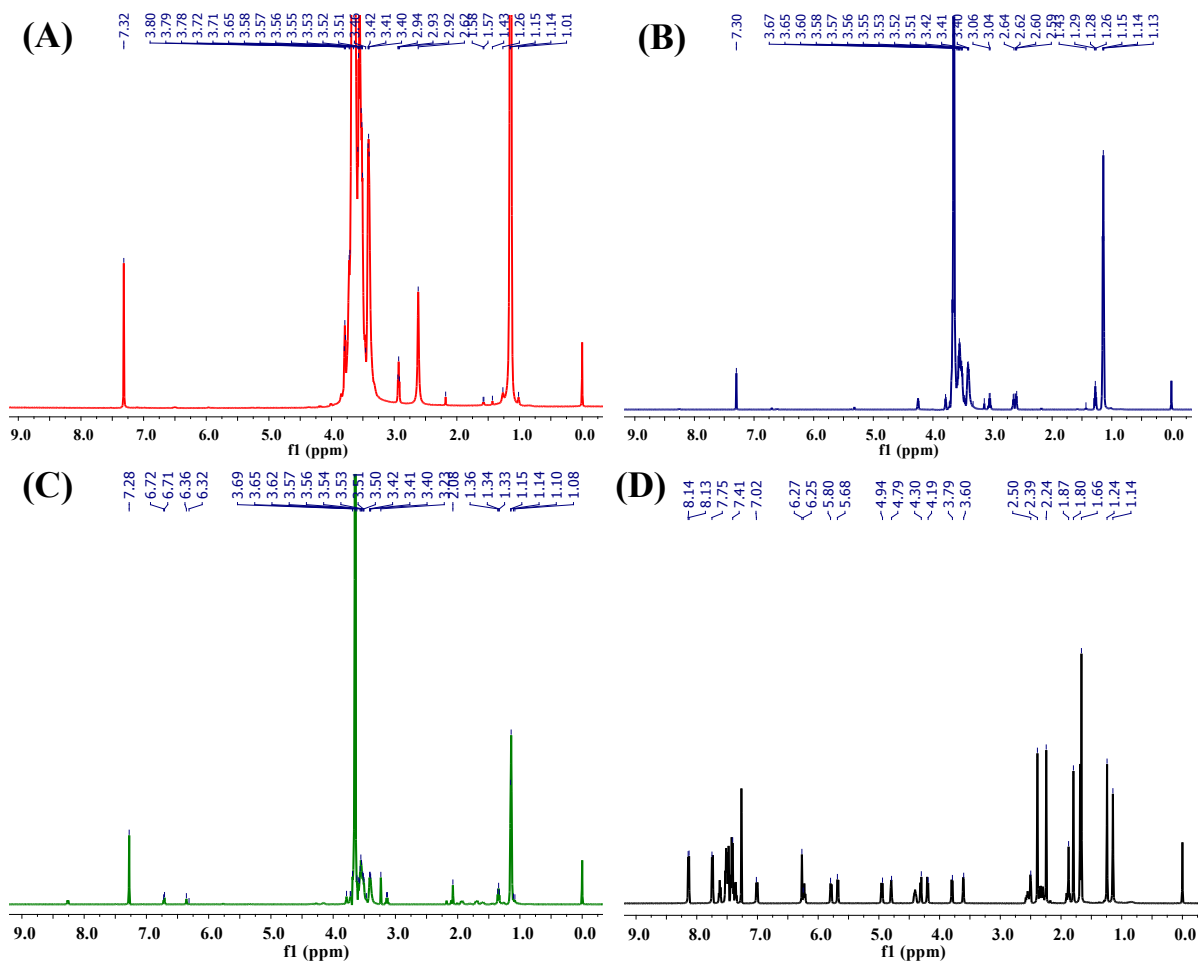

**Figure S2.**  $^1\text{H-NMR}$  spectra of (A) pluronic F68 (F68), (B) succinoyl F68 (F68-SA), (C) cis-aconitinoyl F68 (F68-CAA) and (D) pure paclitaxel (PTX).

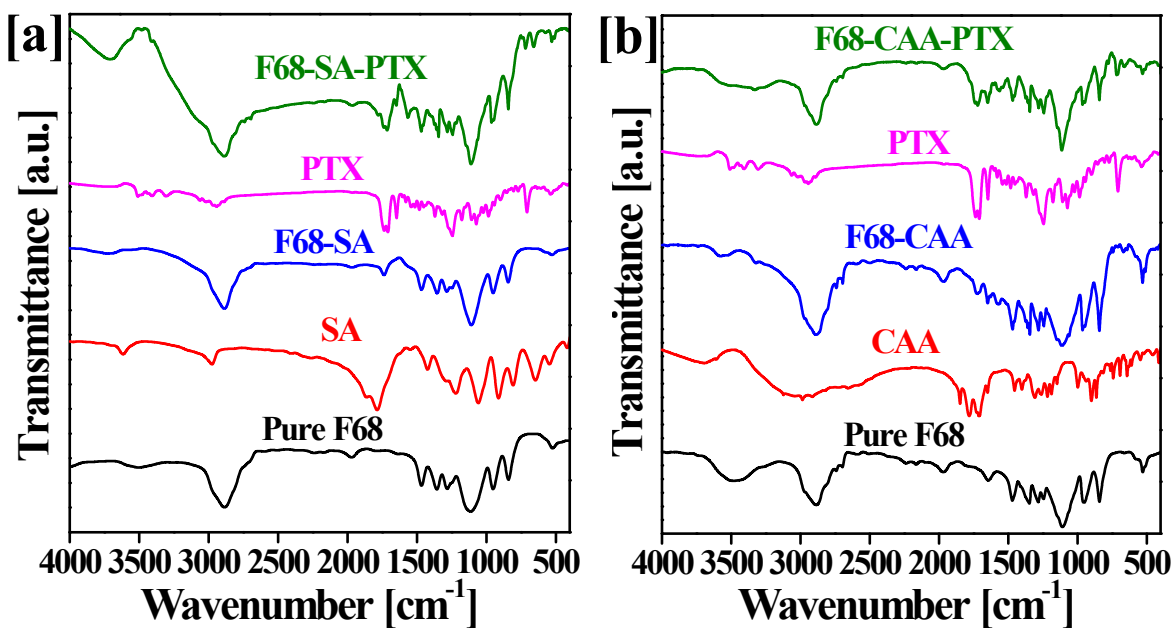

**Figure S3.** FTIR spectra [a] pluronic F68 (F68), succinic anhydride (SA), succinoyl F68 (F68-SA), paclitaxel (PTX), and pluronic F68 and PTX conjugate *via* succinoyl group (F68-SA-PTX), [b] F68, pure cis aconitic anhydride (CAA), cis-aconitinoyl F68 (F68-CAA), PTX and pluronic F68 and PTX conjugate *via* cis-aconitinoyl group (F68-CAA-PTX).

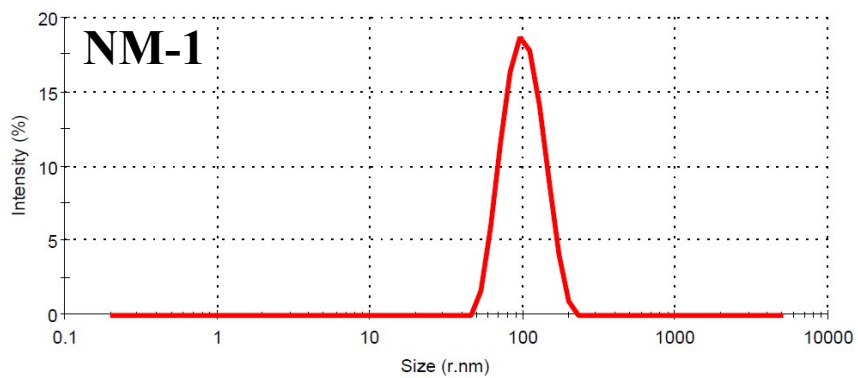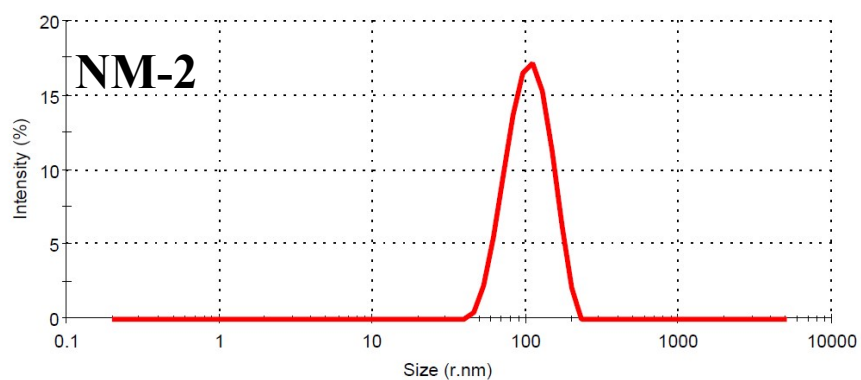

**Figure S4.** Particle size distribution patterns of F68-SA-PTX conjugate nanomicelles (NM-1), and F68-CAA-PTX conjugate nanomicelles (NM-2).
